# Supplementary material for: Long-term stability and reusability of molecularly imprinted polymers
Source: PubMed Central journal article supplement (PMC5361172; doi:10.1039/c6py01853j), 2016-11-24
Supplement: PY-008-C6PY01853J-s001.pdf [file PY-008-C6PY01853J-s001.pdf]

## Electronic Supplementary Information

for

### Long-term stability and reusability of molecularly imprinted polymers

Jozsef Kupai,<sup>1,2</sup> Mayamin Razali,<sup>1</sup> Sibel Buyuktiryaki,<sup>3</sup> Rustem Kecili,<sup>3</sup> Gyorgy Szekely<sup>1,\*</sup>

<sup>1</sup>*School of Chemical Engineering & Analytical Science, The University of Manchester, The Mill,  
Sackville street, Manchester, M13 9PL, United Kingdom*

<sup>2</sup>*Department of Organic Chemistry & Technology, Budapest University of Technology & Economics,  
Szent Gellert ter 4, Budapest, 1117, Hungary*

<sup>3</sup>*Yunus Emre Vocational School, Anadolu University, Eskisehir, 26470, Turkey*

\*Corresponding author, e-mail: gyorgy.szekely@manchester.ac.uk; Tel: +44 (0)161 306 4366

### Table of contents

|             |                                                                                                              |    |
|-------------|--------------------------------------------------------------------------------------------------------------|----|
| Figure S1.  | <sup>1</sup> H-NMR spectrum of 1-(4-vinylphenyl)-3-(3,5-bis(trifluoromethyl)phenyl)urea functional monomer.  | 2  |
| Figure S2.  | <sup>13</sup> C-NMR spectrum of 1-(4-vinylphenyl)-3-(3,5-bis(trifluoromethyl)phenyl)urea functional monomer. | 2  |
| Figure S3.  | <sup>1</sup> H-NMR spectrum of methylenediamine dihydrochloride.                                             | 3  |
| Figure S4.  | <sup>13</sup> C-NMR spectrum of methylenediamine dihydrochloride.                                            | 4  |
| Figure S5.  | <sup>15</sup> N-NMR spectrum of methylenediamine dihydrochloride.                                            | 5  |
| Figure S6.  | <sup>1</sup> H-NMR spectrum of trimethyl borate.                                                             | 6  |
| Figure S7.  | <sup>13</sup> C-NMR spectrum of trimethyl borate.                                                            | 7  |
| Figure S8.  | <sup>11</sup> B-NMR spectrum of trimethyl borate.                                                            | 8  |
| Figure S9.  | <sup>1</sup> H-NMR spectrum of ethylene glycol.                                                              | 9  |
| Figure S10. | <sup>13</sup> C-NMR spectrum of ethylene glycol.                                                             | 10 |
| Table S1.   | Elemental analysis of the imprinted and control polymers after template extraction.                          | 11 |
| Table S2.   | Change in BET surface area of the polymers.                                                                  | 11 |

## 1-(4-vinylphenyl)-3-(3,5-bis(trifluoromethyl)phenyl)urea

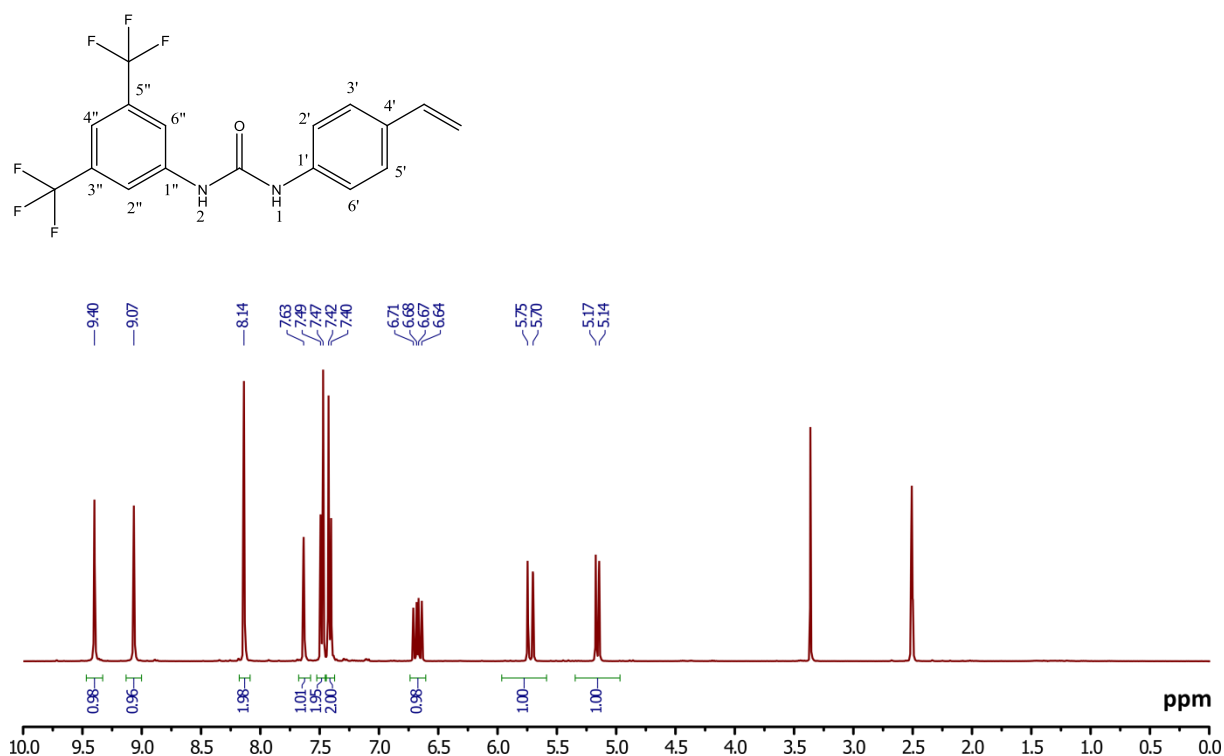

**Figure S1.**  $^1\text{H-NMR}$  spectrum of 1-(4-vinylphenyl)-3-(3,5-bis(trifluoromethyl)phenyl)urea functional monomer.  $^1\text{H-NMR}$  (400 MHz,  $\text{DMSO-d}_6$ )  $\delta$ : 5.16 (1H, dd,  $J=10.8$  Hz, 0.8 Hz,  $\text{CH=CH}_2$ ), 5.73 (1H, dd,  $J=17.6$  Hz, 0.8 Hz,  $\text{CH=CH}_2$ ), 6.68 (1H, dd,  $J_{AB}=10.8$  Hz,  $\text{CH=CH}_2$ ), 7.41 and 7.48 (2 $\times$ 2H, dd,  $J_{AA'BB'}$ =8.6 Hz, Ar-CH-2',6' and Ar-CH-3',5'), 7.63 (1H, s, Ar-CH-4''), 8.14 (2H, s, Ar-CH-2'', 6''), 9.07 (1H, s, urea-NH-3), 9.40 (1H, s, urea-NH-1) ppm.

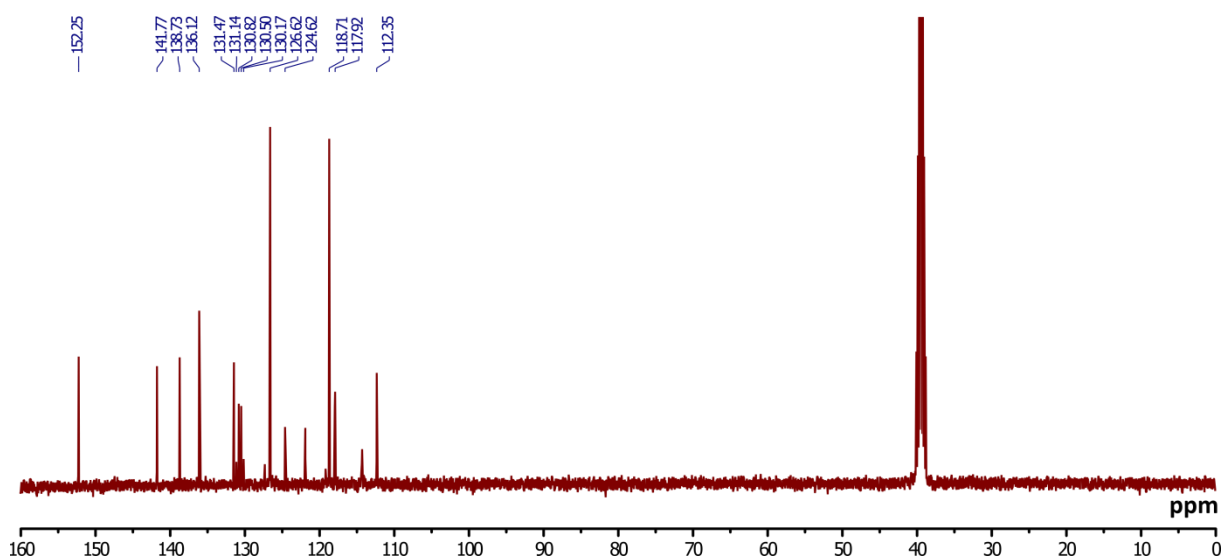

**Figure S2.**  $^{13}\text{C-NMR}$  spectrum of 1-(4-vinylphenyl)-3-(3,5-bis(trifluoromethyl)phenyl)urea functional monomer.  $^{13}\text{C-NMR}$  (100 MHz,  $\text{DMSO-d}_6$ )  $\delta$ : 112.35 ( $\text{CH=CH}_2$ ), 117.92 (Ar-CH-4''), 118.71 (Ar-CH-2'', 6''), 124.62 ( $\text{CF}_3$ ), 126.62 (Ar-CH-3',5'), 127.33 (Ar-CH-4'), 130.66 (q, Ar-CH-3'',5''), 131.47 (Ar-CH-2', 6'), 136.12 ( $\text{CH=CH}_2$ ), 138.73 (Ar-CH-1'), 141.77 (Ar-CH-1''), 152.25 (urea C) ppm.

## Methylene diamine dihydrochloride

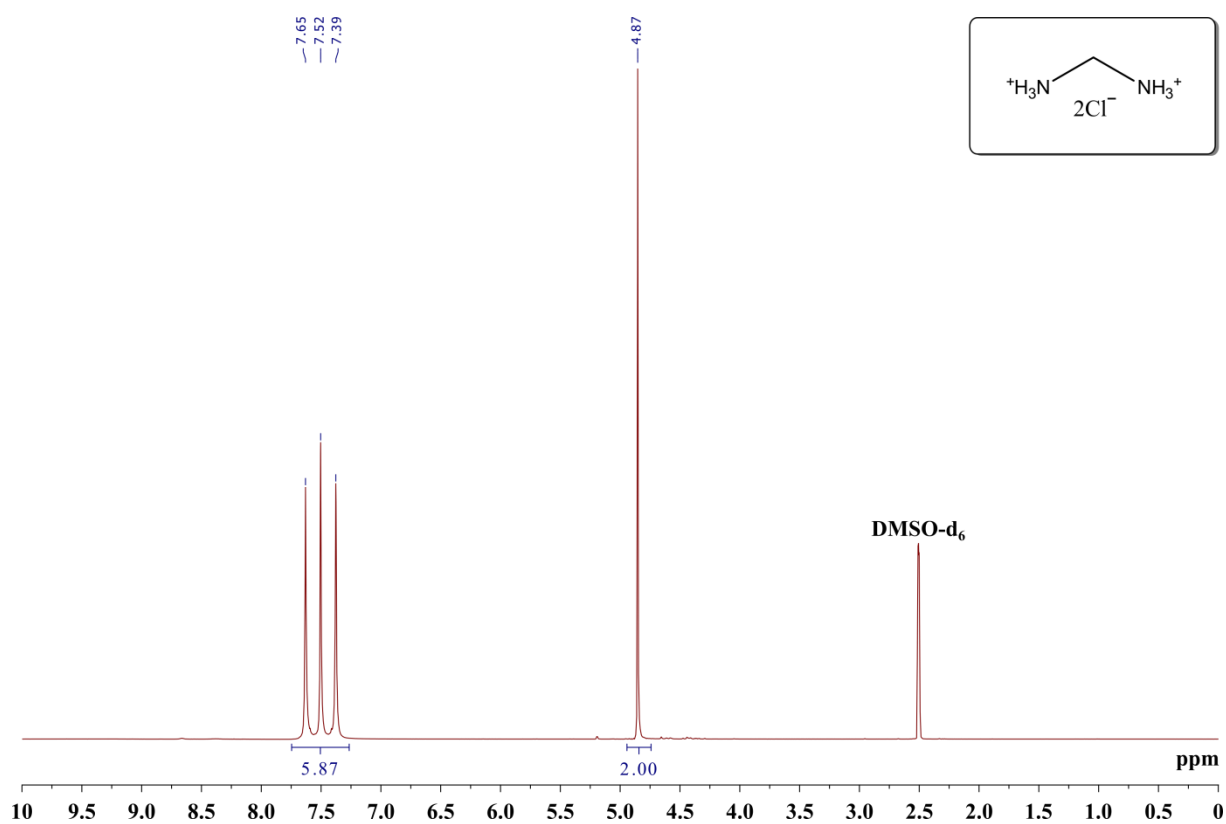

**Figure S3.**  $^1\text{H-NMR}$  spectrum of methylenediamine dihydrochloride.  $^1\text{H-NMR}$  (400 MHz,  $\text{DMSO-d}_6$ )  $\delta$ : 4.87 (2H, s,  $\text{CH}_2$ ), 7.52 (6H, t,  $J=50.8$  Hz,  $\text{NH}_3^+$ ) ppm.

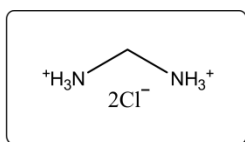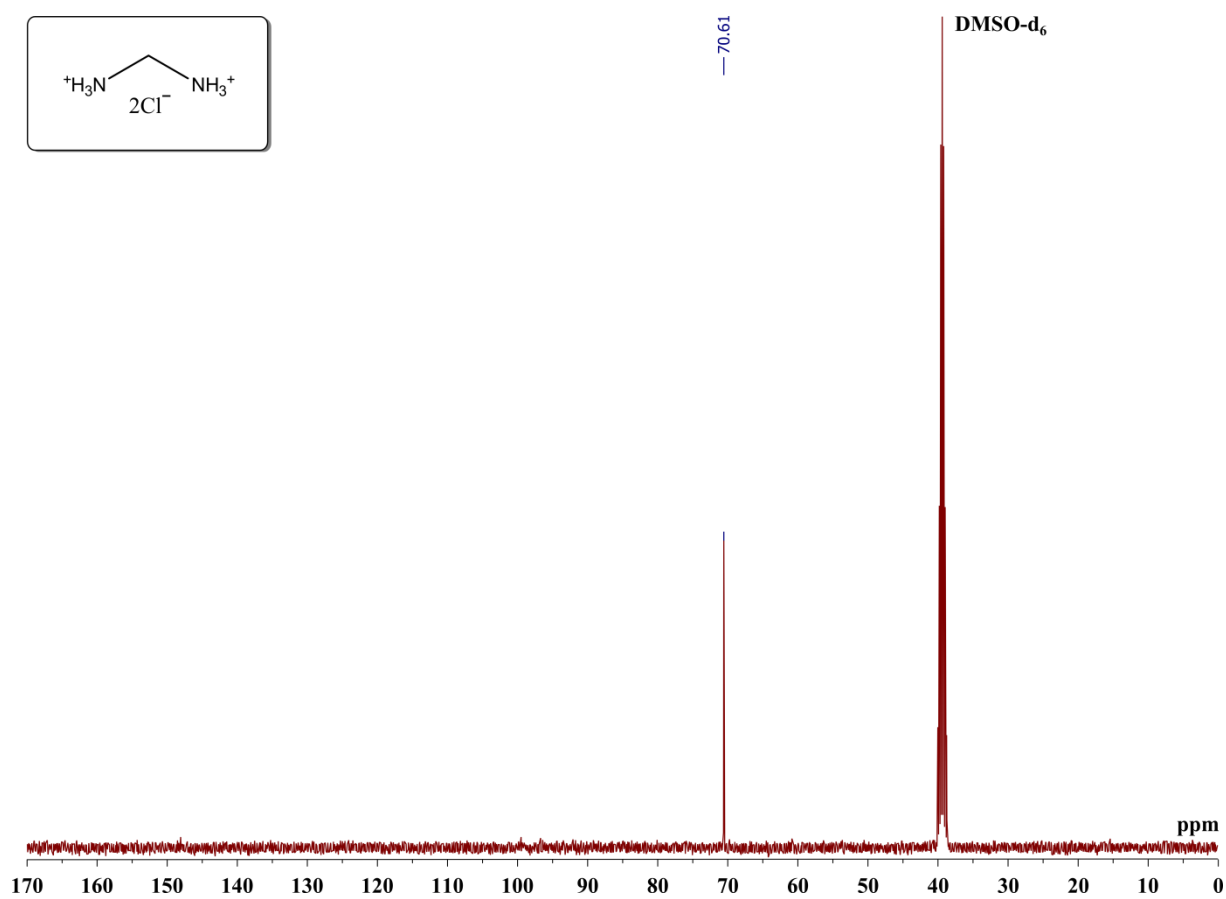

**Figure S4.** <sup>13</sup>C-NMR spectrum of methylenediamine dihydrochloride. <sup>13</sup>C-NMR (100 MHz, DMSO-d<sub>6</sub>)  
δ: 70.61 (CH<sub>2</sub>) ppm.

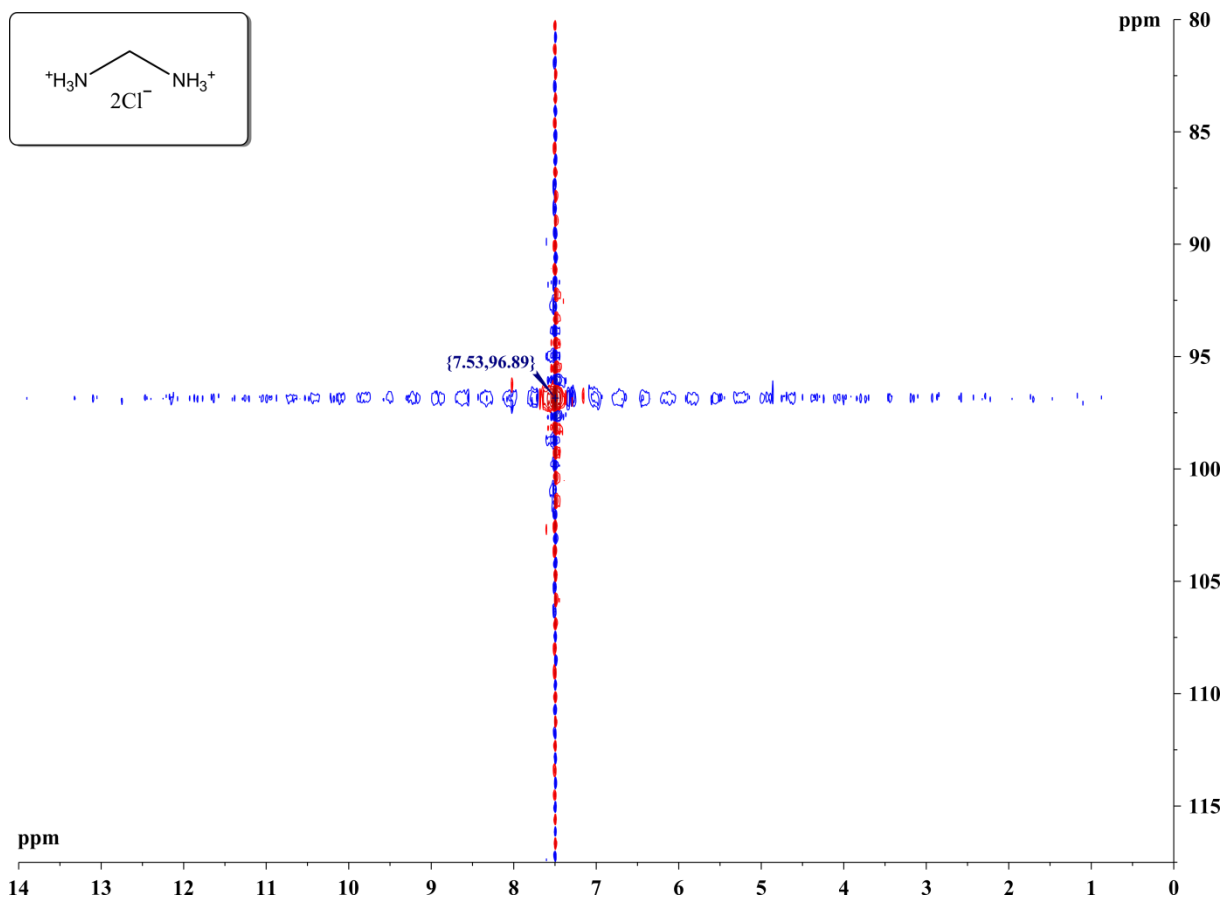

**Figure S5.**  $^{15}\text{N}$ -NMR spectrum of methylenediamine dihydrochloride.  $^{15}\text{N}$ -NMR (50.8 MHz,  $\text{DMSO-d}_6$ )  $\delta$ : 96.85 ( $\text{NH}_3^+$ ) ppm.

## Trimethyl borate

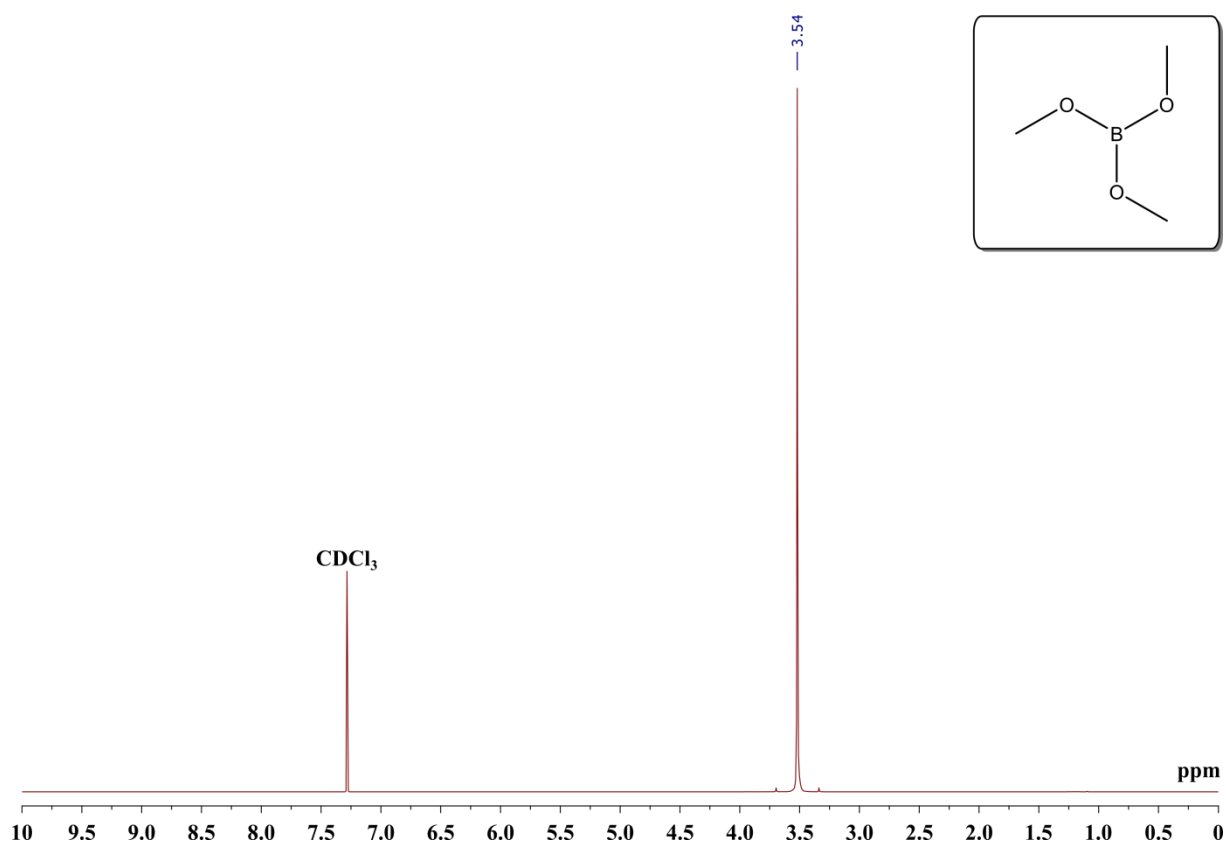

**Figure S6.**  $^1\text{H-NMR}$  spectrum of trimethyl borate.  $^1\text{H-NMR}$  (400 MHz,  $\text{CDCl}_3$ )  $\delta$ : 3.52 (9H, s,  $\text{OCH}_3$ ) ppm.

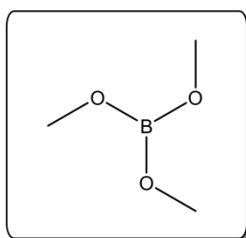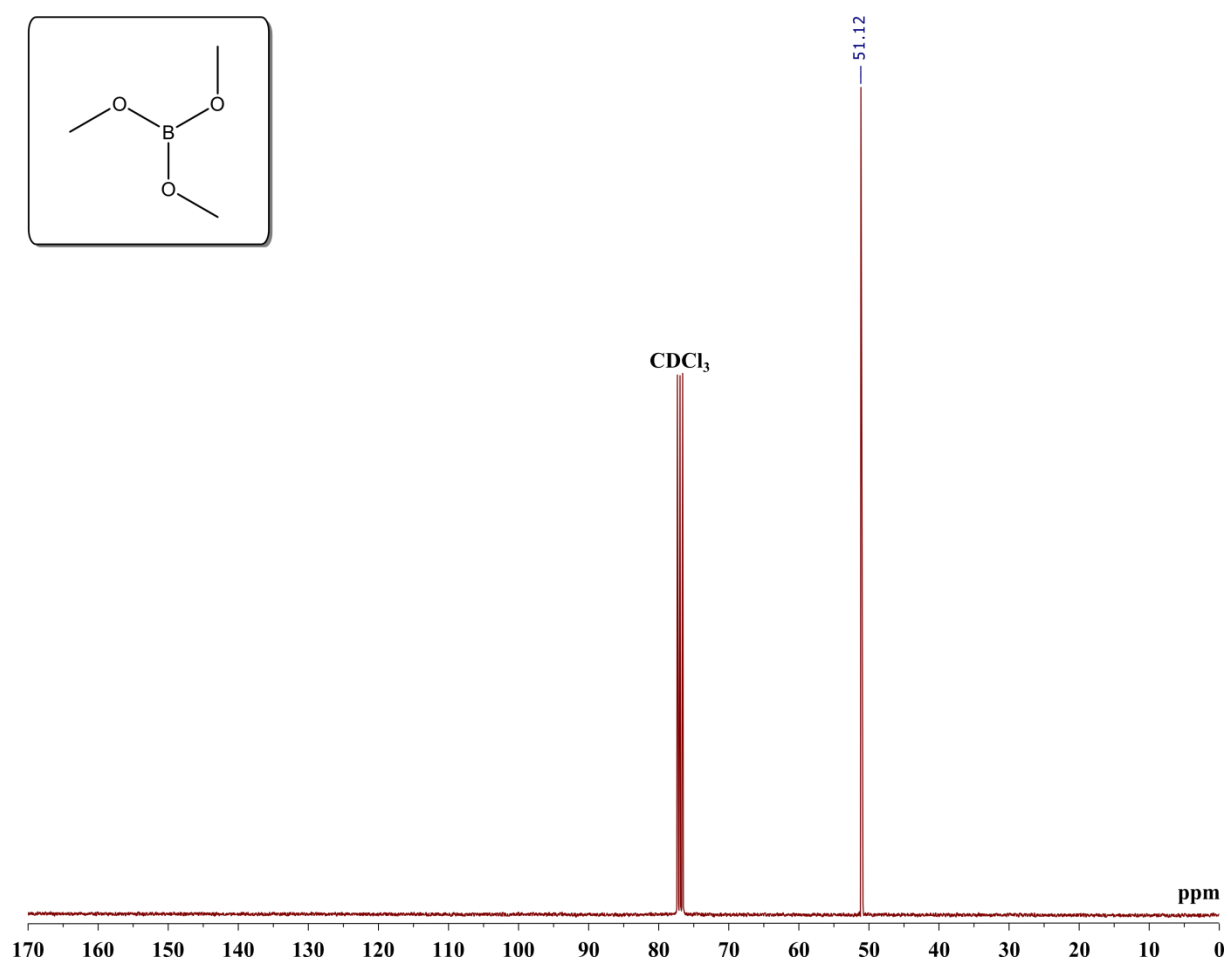

**Figure S7.** <sup>13</sup>C-NMR spectrum of trimethyl borate. <sup>13</sup>C-NMR (100 MHz, CDCl<sub>3</sub>) δ= 51.17 (OCH<sub>3</sub>) ppm.

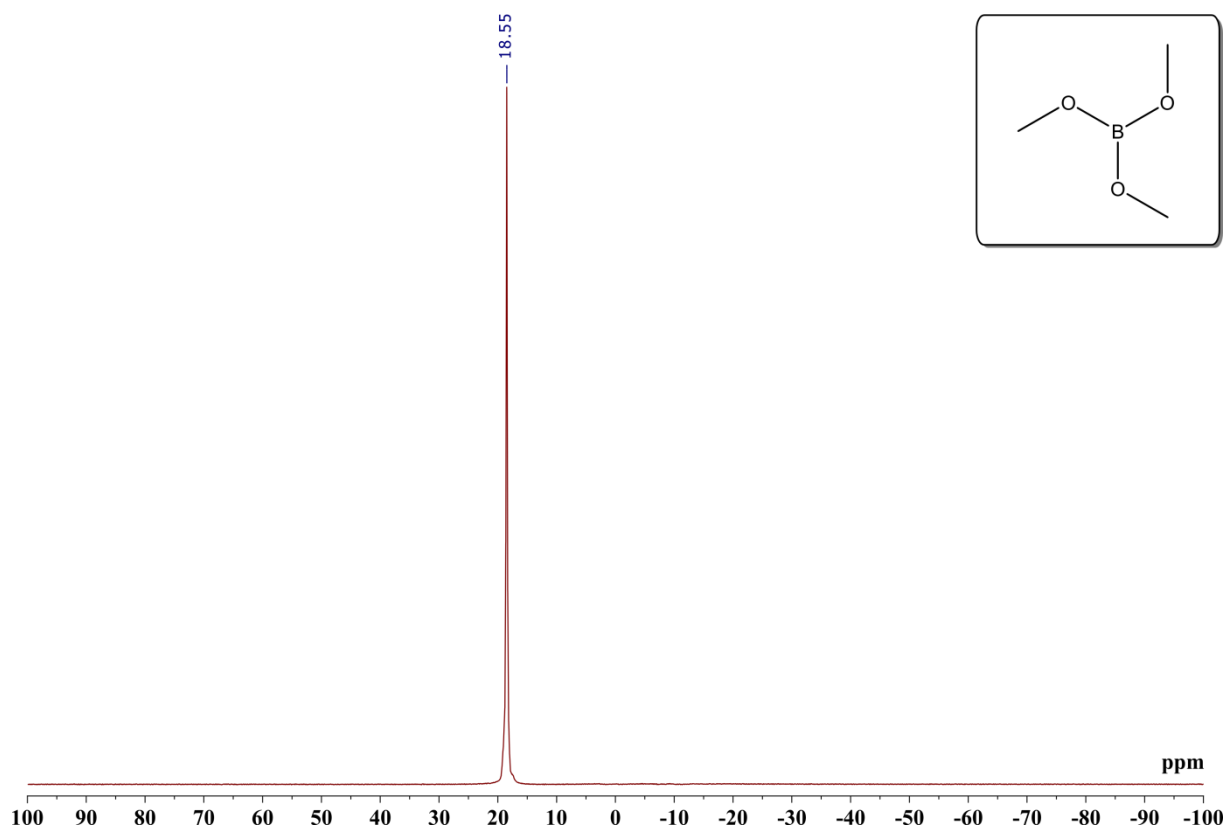

**Figure S8.**  $^{11}\text{B}$ -NMR spectrum of trimethyl borate.  $^{11}\text{B}$ -NMR (160.5 MHz,  $\text{CDCl}_3$ )  $\delta = 18.49$  [ $\text{B}(\text{OCH}_3)_3$ ] ppm.



## Ethylene glycol

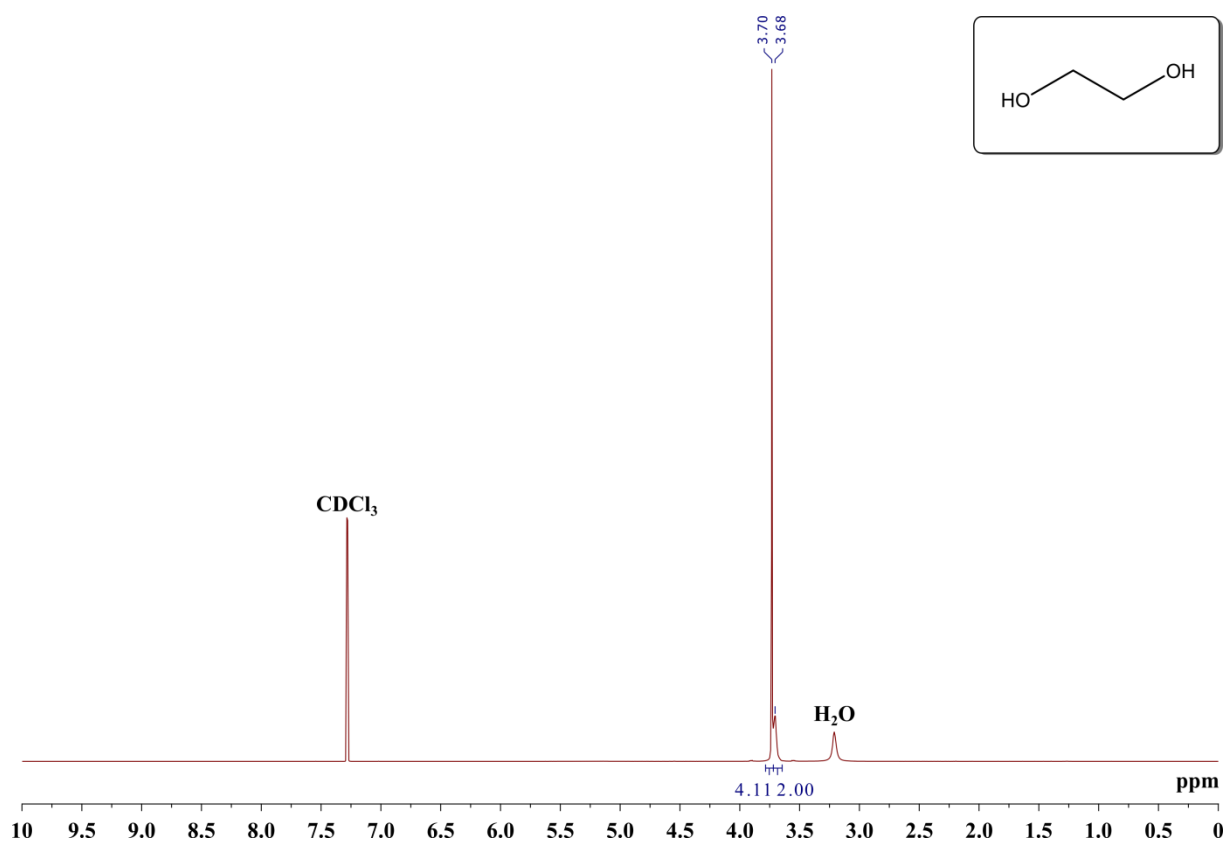

**Figure S9.** <sup>1</sup>H-NMR spectrum of ethylene glycol. <sup>1</sup>H-NMR (400 MHz, CDCl<sub>3</sub>) δ: 3.68 (2H, br. s, OH), 3.70 (4H, s, CH<sub>2</sub>) ppm.

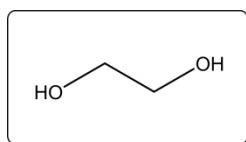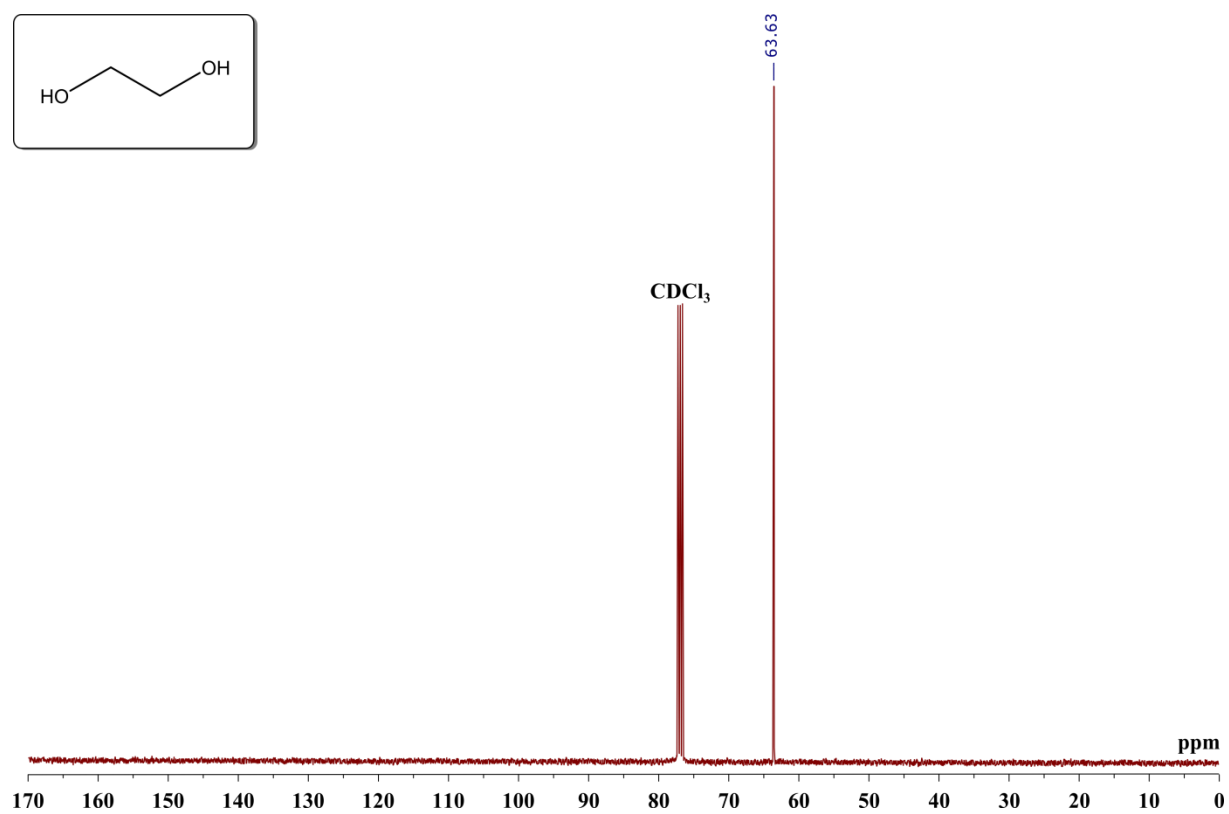

**Figure S10.**  $^{13}\text{C}$ -NMR spectrum of ethylene glycol.  $^{13}\text{C}$ -NMR (100 MHz,  $\text{CDCl}_3$ )  $\delta$ : 63.67 ( $\text{CH}_2$ ) ppm.

**Table S1.** Elemental analysis of the imprinted and control polymers after template extraction. Anal. Calcd/Found. See Table 1 in the main manuscript for the conditions of polymer preparation.

| Polymers | Carbon (%)  | Hydrogen (%) | Nitrogen (%) |
|----------|-------------|--------------|--------------|
| IP1      | 60.87/60.83 | 7.24/7.25    | 0.43/0.41    |
| IP2      | 60.59/60.52 | 7.17/7.19    | 0.23/0.26    |
| IP3      | 61.04/60.96 | 7.22/7.22    | 0.02/0.05    |
| IP4      | 60.74/60.78 | 7.14/7.16    | 0.24/0.22    |
| IP5      | 61.27/61.25 | 7.19/7.23    | 0.02/0.04    |
| IP6      | 60.95/60.86 | 7.16/7.18    | 0.01/0.05    |
| IP7      | 60.87/60.82 | 7.24/7.21    | 0.43/0.45    |
| IP8      | 60.58/60.63 | 7.21/7.25    | 0.43/0.39    |
| IP9      | 61.04/60.11 | 7.22/7.24    | 0.02/0.05    |
| IP10     | 60.88/60.92 | 7.16/7.12    | 0.46/0.51    |
| IP11     | 61.27/61.34 | 7.19/7.20    | 0.02/0.03    |
| CP1      | 60.87/60.89 | 7.24/7.28    | 0.43/0.45    |
| CP2      | 60.59/60.48 | 7.17/7.15    | 0.23/0.19    |
| CP3      | 61.04/60.96 | 7.22/7.25    | 0.02/0.05    |
| CP4      | 60.74/60.78 | 7.14/7.11    | 0.24/0.22    |
| CP5      | 61.27/61.35 | 7.19/7.18    | 0.02/0.04    |
| CP6      | 60.95/61.21 | 7.16/7.13    | 0.01/0.00    |
| CP7      | 60.87/60.59 | 7.24/7.27    | 0.43/0.45    |
| CP8      | 60.58/60.51 | 7.21/7.18    | 0.43/0.41    |
| CP9      | 61.04/60.87 | 7.22/7.20    | 0.02/0.05    |
| CP10     | 60.88/60.96 | 7.16/7.16    | 0.46/0.42    |
| CP11     | 61.27/61.34 | 7.19/7.22    | 0.02/0.04    |

**Table S2.** Change in BET surface area of the polymers given in  $\text{m}^2 \cdot \text{g}^{-1}$  unit. The template extraction method is given after the forward slash. See Table 1 and 2 in the main manuscript for the polymer compositions and the conditions of the template extratcion methods, respectively.

| # of adsorption-regeneration cycle | # of adsorption-regeneration cycle |        |        |         |         |         |         |
|------------------------------------|------------------------------------|--------|--------|---------|---------|---------|---------|
|                                    | IP1/#6                             | IP3/#6 | IP5/#6 | IP10/#6 | IP10/#5 | IP11/#6 | IP11/#5 |
| 1                                  | 62±2                               | 64±3   | 60±1   | 50±2    | 51±1    | 48±2    | 49±1    |
| 10                                 | 58±2                               | 64±2   | 58±1   | 50±2    | 52±1    | 48±2    | 49±2    |
| 20                                 | 54±2                               | 64±3   | 56±1   | 50±2    | 53±1    | 48±2    | 51±2    |
| 30                                 | 52±2                               | 65±2   | 55±1   | 50±2    | 54±1    | 48±2    | 52±1    |
| 40                                 | 50±2                               | 64±2   | 54±1   | 49±2    | 55±1    | 48±2    | 53±1    |
| 50                                 | 47±2                               | 64±2   | 52±2   | 49±2    | 56±1    | 48±1    | 55±2    |
| 60                                 | 43±2                               | 63±2   | 51±2   | 50±2    | -       | 48±1    | 55±1    |
| 70                                 | 39±3                               | 65±2   | 50±3   | 50±2    | -       | 48±2    | 56±1    |
| 80                                 | 36±4                               | 64±2   | 48±3   | 50±2    | -       | 48±1    | 57±1    |
| 90                                 | 34±4                               | 65±2   | 46±3   | 50±2    | -       | 47±2    | 57±1    |
| 100                                | 29±4                               | 64±2   | 44±4   | 49±2    | -       | 47±2    | 58±1    |
